# Supplementary material for: Symmetry breaking through molecular engineering to achieve “on–off–on” nonlinear optical switch in a [SnCl6]2− framework
Source: Royal Society of Chemistry journal article supplement (doi:10.1039/d4cc03006k), 2024-01-01
Supplement: d4cc03006k1.pdf [file d4cc03006k1.pdf]

## Supporting Information

### **Symmetry breaking through molecular engineering to achieve “on-off-on” nonlinear optical switch in a [SnCl<sub>6</sub>]<sup>2-</sup> framework**

Zhuoer Cai <sup>1,a</sup>, Yinan Zhang <sup>1,a</sup>, Jian Chen <sup>a</sup>, Xiaofan He <sup>a</sup>, Ziyue Zhang <sup>a</sup>, Xiu-Ni Hua <sup>b,\*</sup> and Baiwang Sun <sup>a,\*</sup>

<sup>a</sup>School of Chemistry and Chemical Engineering, Southeast University, Nanjing 211189, P. R. China.

<sup>b</sup>School of Environmental Science, Nanjing Xiaozhuang University, Nanjing 211171, P. R. China.

**Fig. S1**  $^1\text{H-NMR}$  of. *N, N, N, O*-tetramethylhydroxylammonium.

**Fig. S2** Simulated and measured PXRD patterns of **1** (a) and **2** (b).

**Fig. S3** TG measurements of **1** (a) and **2** (b).

**Fig. S4** IR test of **1** (a) and **2** (b).

**Fig. S5** (a) Dielectric constant of **1** at different frequencies. (b) Dielectric constant of **1** at 1 MHz (Red line is heating while black line is cooling).

**Fig. S6** Maximal subgroups and minimal supergroups of the three-dimensional crystallographic point groups. The change of crystal system of **1** and **2** during the phase transition.

**Table S1** Crystal data and structure refinement of **1**.

**Table S2** Crystal data and structure refinement of **2**.

## Synthesis

12 mL trimethylamine (33% in ethanol solution) was added into the flask and stirred in ice water bath. 15 mL 30 % H<sub>2</sub>O<sub>2</sub> solution was is dropped into the solution and the mixture was left standing overnight. The mixture was then stirred at 350 K for 4 hours. The solvent was removed to afford the trimethylamine oxide as white solid (5.14 g, yielded 99.9 %).

5.14 g trimethylamine oxide and 100 mL acetonitrile were mixed and stirred in ice water bath. 6 mL dimethyl sulfate was added slowly into the solvent and the mixture was then heated to 340 K for 3 hours. The reaction mixture was quenched by the addition of 10 mL water. The solvent was removed to obtain *N,N,N,O*-tetramethylhydroxylammonium sulfate (7.12 g, yielded 98.0 %). The structure was confirmed by <sup>1</sup>H NMR (600 MHz, Deuterium Oxide) δ 3.78 – 3.72 (m, 3H), 3.42 – 3.37 (m, 9H) as shown in **Fig. S1**.

20240506.146.fid

$^1\text{H}$  NMR (600 MHz, Deuterium Oxide)  $\delta$  3.78  
– 3.72 (m, 3H), 3.42 – 3.37 (m, 9H).

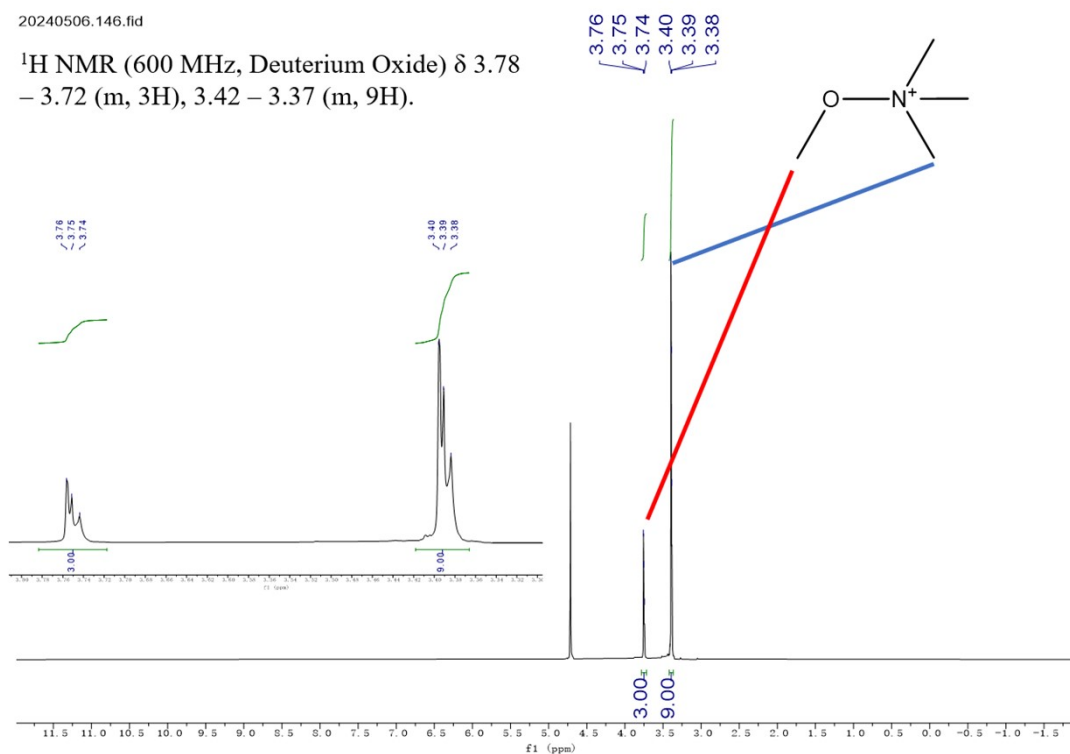

Fig. S1  $^1\text{H}$ -NMR of *N,N,N,O*-tetramethylhydroxylammonium.

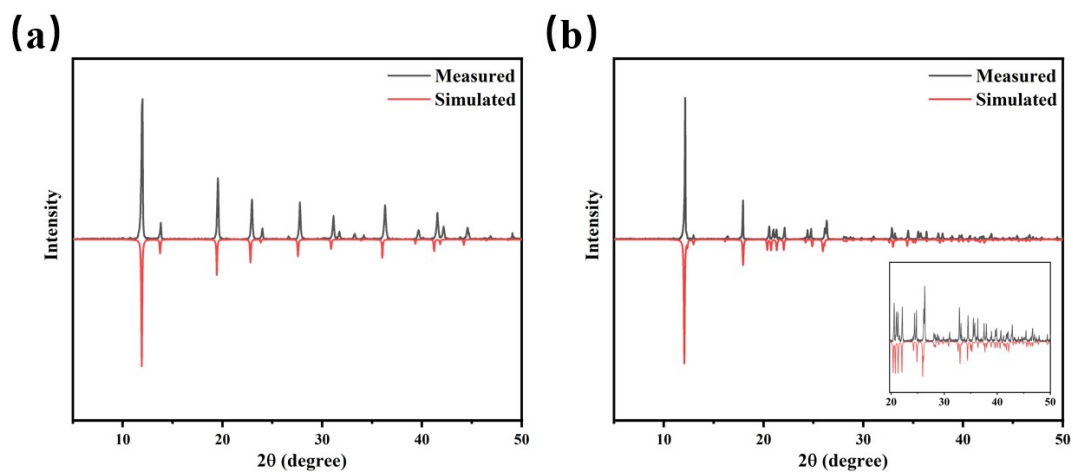

Fig. S2 Simulated and measured PXRD patterns of 1 (a) and 2 (b).

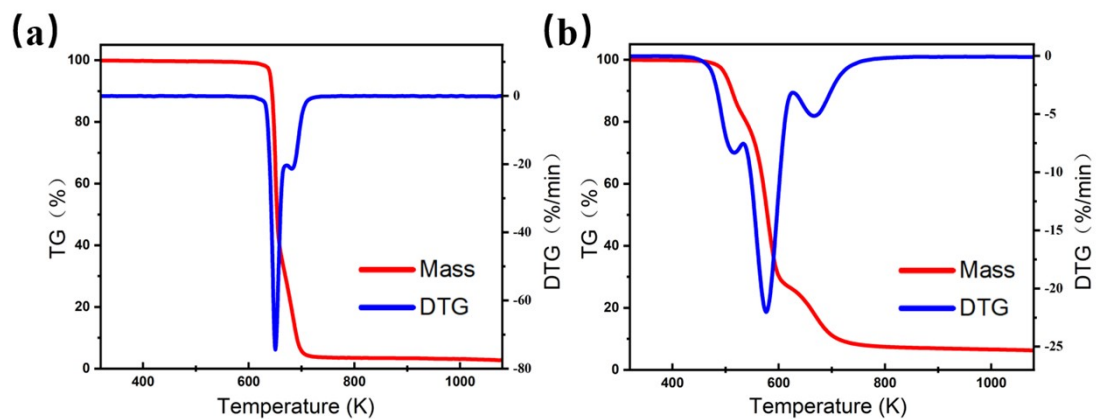

Fig. S3 TG measurements of **1** (a) and **2** (b).

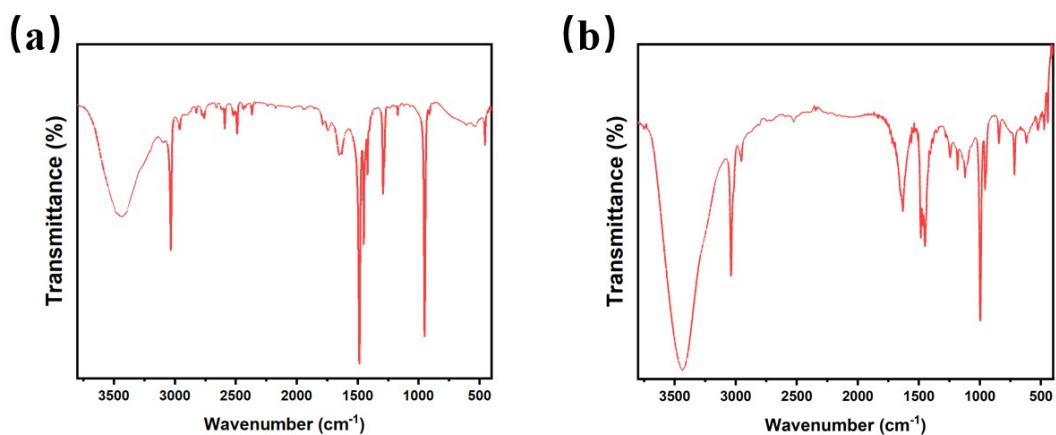

Fig. S4 IR test of **1** (a) and **2** (b).

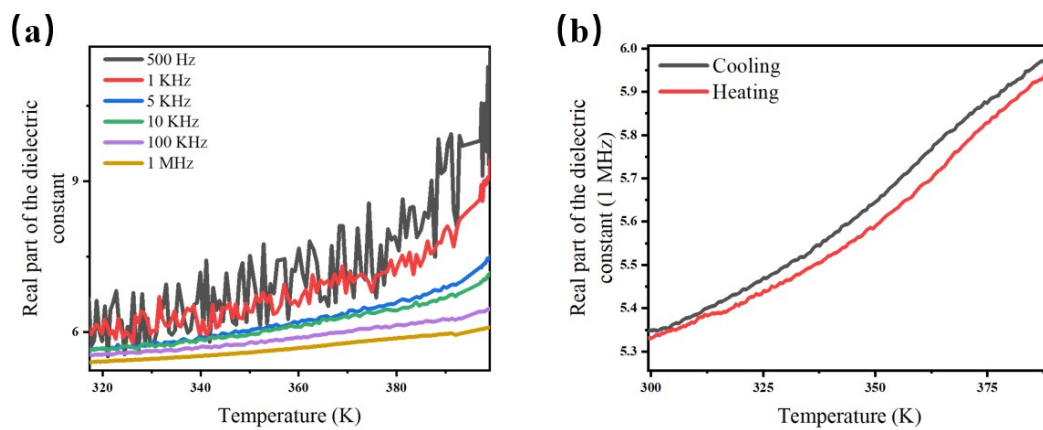

Fig. S5 (a) Dielectric constant of **1** at different frequencies. (b) Dielectric constant of **1** at 1 MHz (Red line is

heating while black line is cooling).

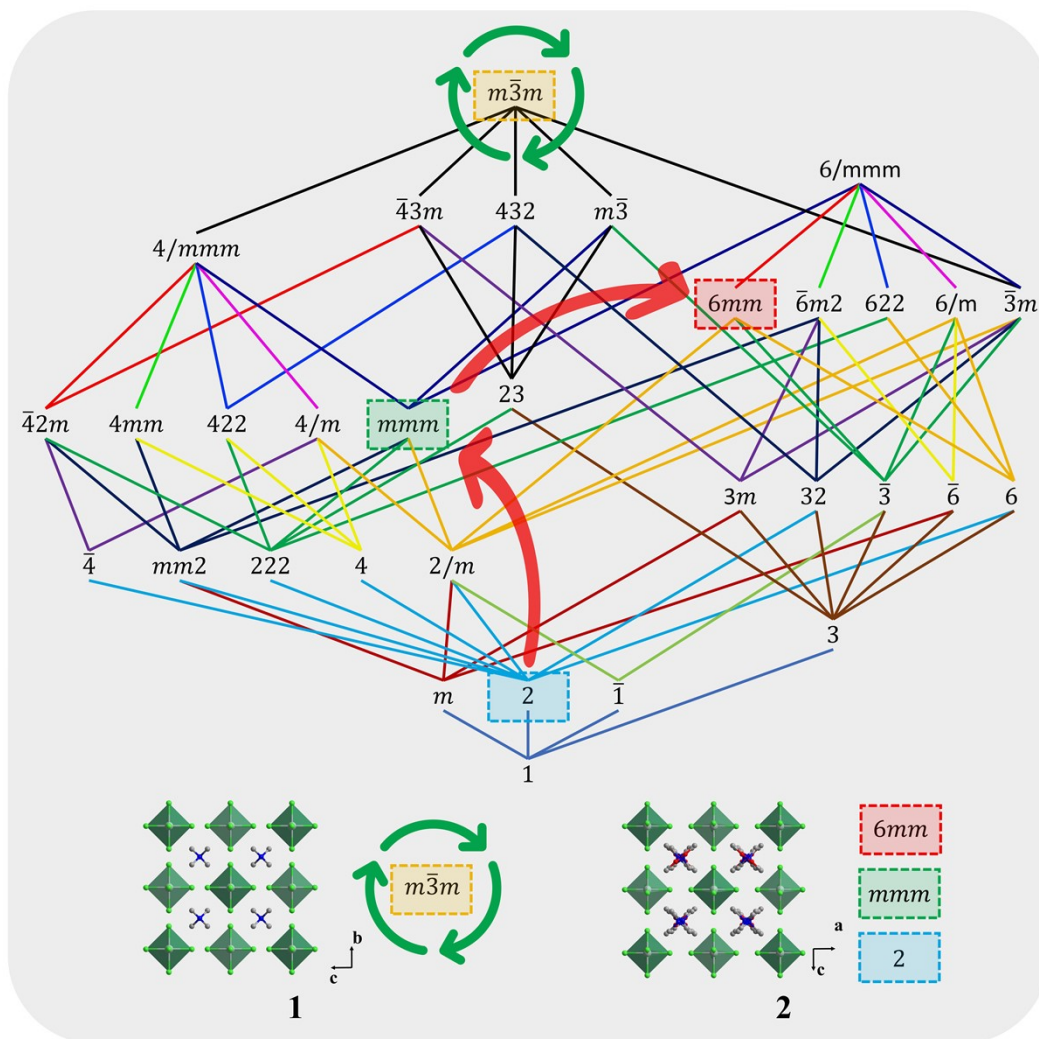

**Fig. S6** Maximal subgroups and minimal supergroups of the three-dimensional crystallographic point groups.

The change of crystal system of **1** and **2** during the phase transition.

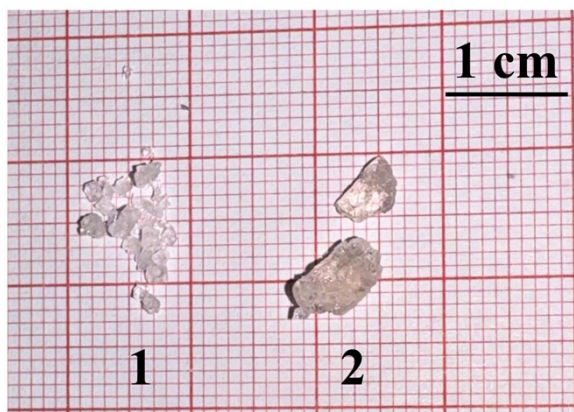

**Fig. S7** Crystal sample of **1** and **2**.

**Table S1** Crystal data and structure refinement of **1** at LTP.

|                                                                 |                                                                               |                                                                               |
|-----------------------------------------------------------------|-------------------------------------------------------------------------------|-------------------------------------------------------------------------------|
| CCDC number                                                     | 2361546                                                                       | 2361547                                                                       |
| Empirical formula                                               | C <sub>8</sub> H <sub>24</sub> Cl <sub>6</sub> N <sub>2</sub> Sn              | C <sub>8</sub> H <sub>24</sub> Cl <sub>6</sub> N <sub>2</sub> Sn              |
| Formula weight                                                  | 479.68                                                                        | 479.68                                                                        |
| Temperature [K]                                                 | 300.00                                                                        | 400.00                                                                        |
| Crystal system                                                  | cubic                                                                         | cubic                                                                         |
| Space group (number)                                            | <i>Fd</i> $\bar{3}c$ (228)                                                    | <i>Fm</i> $\bar{3}m$ (225)                                                    |
| <i>a</i> [Å]                                                    | 25.724(4)                                                                     | 13.017(6)                                                                     |
| <i>b</i> [Å]                                                    | 25.724(4)                                                                     | 13.017(6)                                                                     |
| <i>c</i> [Å]                                                    | 25.724(4)                                                                     | 13.017(6)                                                                     |
| $\alpha$ [°]                                                    | 90                                                                            | 90                                                                            |
| $\beta$ [°]                                                     | 90                                                                            | 90                                                                            |
| $\gamma$ [°]                                                    | 90                                                                            | 90                                                                            |
| Volume [Å <sup>3</sup> ]                                        | 17023(8)                                                                      | 2205(3)                                                                       |
| <i>Z</i>                                                        | 32                                                                            | 4                                                                             |
| $\rho_{\text{calc}}$ [gcm <sup>-3</sup> ]                       | 1.497                                                                         | 1.445                                                                         |
| $\mu$ [mm <sup>-1</sup> ]                                       | 1.941                                                                         | 1.873                                                                         |
| <i>F</i> (000)                                                  | 7616                                                                          | 952                                                                           |
| Crystal size [mm <sup>3</sup> ]                                 |                                                                               | 0.15×0.14×0.12                                                                |
| Crystal colour                                                  |                                                                               | clear light colourless                                                        |
| Crystal shape                                                   |                                                                               | block                                                                         |
| Radiation                                                       | MoK $\alpha$ ( $\lambda=0.71073$ Å)                                           | MoK $\alpha$ ( $\lambda=0.71073$ Å)                                           |
| 2 $\theta$ range [°]                                            | 4.48 to 52.80 (0.80 Å)                                                        | 10.39 to 54.68 (0.77 Å)                                                       |
| Index ranges                                                    | -28 ≤ <i>h</i> ≤ 32<br>-28 ≤ <i>k</i> ≤ 31<br>-32 ≤ <i>l</i> ≤ 32             | -16 ≤ <i>h</i> ≤ 15<br>-14 ≤ <i>k</i> ≤ 16<br>-16 ≤ <i>l</i> ≤ 16             |
| Reflections collected                                           | 22802                                                                         | 4152                                                                          |
| Independent reflections                                         | 732<br><i>R</i> <sub>int</sub> = 0.0906<br><i>R</i> <sub>sigma</sub> = 0.0248 | 161<br><i>R</i> <sub>int</sub> = 0.0668<br><i>R</i> <sub>sigma</sub> = 0.0360 |
| Completeness to<br>$\theta = 25.242^\circ$                      | 98.5 %                                                                        | 97.0 %                                                                        |
| Goodness-of-fit on <i>F</i> <sup>2</sup>                        | 1.101                                                                         | 1.225                                                                         |
| Final <i>R</i> indexes<br>[ <i>I</i> ≥ 2 $\sigma$ ( <i>I</i> )] | <i>R</i> <sub>1</sub> = 0.0316<br><i>wR</i> <sub>2</sub> = 0.0742             | <i>R</i> <sub>1</sub> = 0.0429<br><i>wR</i> <sub>2</sub> = 0.1422             |
| Final <i>R</i> indexes<br>[all data]                            | <i>R</i> <sub>1</sub> = 0.0503<br><i>wR</i> <sub>2</sub> = 0.0897             | <i>R</i> <sub>1</sub> = 0.0437<br><i>wR</i> <sub>2</sub> = 0.1445             |
| Largest peak/hole [eÅ <sup>-3</sup> ]                           | 0.37/-0.62                                                                    | 0.24/-0.48                                                                    |



**Table S2** Crystal data and structure refinement of **2** at LTP.

| CCDC number                                                     | 2357973                                                                         | 2357974                                                                         | 2357975                                                                         |
|-----------------------------------------------------------------|---------------------------------------------------------------------------------|---------------------------------------------------------------------------------|---------------------------------------------------------------------------------|
| Empirical formula                                               | C <sub>8</sub> H <sub>24</sub> Cl <sub>6</sub> N <sub>2</sub> O <sub>2</sub> Sn | C <sub>8</sub> H <sub>24</sub> Cl <sub>6</sub> N <sub>2</sub> O <sub>2</sub> Sn | C <sub>8</sub> H <sub>24</sub> Cl <sub>6</sub> N <sub>2</sub> O <sub>2</sub> Sn |
| Formula weight                                                  | 511.68                                                                          | 511.68                                                                          | 511.68                                                                          |
| Temperature [K]                                                 | 260.00                                                                          | 363.00                                                                          | 400.00                                                                          |
| Crystal system                                                  | monoclinic                                                                      | orthorhombic                                                                    | hexagonal                                                                       |
| Space group (number)                                            | <i>P2</i> <sub>1</sub> (4)                                                      | <i>Cmca</i> (64)                                                                | <i>P63mc</i> (186)                                                              |
| <i>a</i> [Å]                                                    | 9.2612(17)                                                                      | 14.3092(14)                                                                     | 9.6998(9)                                                                       |
| <i>b</i> [Å]                                                    | 12.665(3)                                                                       | 10.9809(14)                                                                     | 9.6998(9)                                                                       |
| <i>c</i> [Å]                                                    | 9.3535(18)                                                                      | 13.6510(14)                                                                     | 12.6019(18)                                                                     |
| $\alpha$ [°]                                                    | 90                                                                              | 90                                                                              | 90                                                                              |
| $\beta$ [°]                                                     | 114.940(7)                                                                      | 90                                                                              | 90                                                                              |
| $\gamma$ [°]                                                    | 90                                                                              | 90                                                                              | 120                                                                             |
| Volume [Å <sup>3</sup> ]                                        | 994.8(3)                                                                        | 2145.0(4)                                                                       | 1026.8(2)                                                                       |
| <i>Z</i>                                                        | 2                                                                               | 4                                                                               | 2                                                                               |
| $\rho_{\text{calc}}$ [gcm <sup>-3</sup> ]                       | 1.708                                                                           | 1.584                                                                           | 1.655                                                                           |
| $\mu$ [mm <sup>-1</sup> ]                                       | 2.089                                                                           | 1.937                                                                           | 2.024                                                                           |
| <i>F</i> (000)                                                  | 508                                                                             | 1016                                                                            | 508                                                                             |
| Crystal size [mm <sup>3</sup> ]                                 |                                                                                 | 0.11×0.09×0.07                                                                  |                                                                                 |
| Crystal colour                                                  |                                                                                 | clear light colourless                                                          |                                                                                 |
| Crystal shape                                                   |                                                                                 | block                                                                           |                                                                                 |
| Radiation                                                       |                                                                                 | MoK $\alpha$ ( $\lambda$ =0.71073 Å)                                            |                                                                                 |
| 2 $\theta$ range [°]                                            | 4.85 to 52.65 (0.80 Å)                                                          | 7.42 to 52.76 (0.80 Å)                                                          | 9.71 to 50.05 (0.84 Å)                                                          |
|                                                                 | -11 ≤ <i>h</i> ≤ 11                                                             | -16 ≤ <i>h</i> ≤ 17                                                             | -11 ≤ <i>h</i> ≤ 10                                                             |
| Index ranges                                                    | -15 ≤ <i>k</i> ≤ 15                                                             | -13 ≤ <i>k</i> ≤ 13                                                             | -11 ≤ <i>k</i> ≤ 11                                                             |
|                                                                 | -11 ≤ <i>l</i> ≤ 11                                                             | -15 ≤ <i>l</i> ≤ 17                                                             | -15 ≤ <i>l</i> ≤ 12                                                             |
| Reflections collected                                           | 8615                                                                            | 7797                                                                            | 6536                                                                            |
|                                                                 | 3942                                                                            | 1136                                                                            | 691                                                                             |
| Independent reflections                                         | <i>R</i> <sub>int</sub> = 0.0430                                                | <i>R</i> <sub>int</sub> = 0.0517                                                | <i>R</i> <sub>int</sub> = 0.0567                                                |
|                                                                 | <i>R</i> <sub>sigma</sub> = 0.0573                                              | <i>R</i> <sub>sigma</sub> = 0.0320                                              | <i>R</i> <sub>sigma</sub> = 0.0304                                              |
| Completeness to<br>$\theta = 25.242^\circ$                      | 98.9 %                                                                          | 98.9 %                                                                          | 97.9 %                                                                          |
| Goodness-of-fit on <i>F</i> <sup>2</sup>                        | 1.034                                                                           | 1.028                                                                           | 1.014                                                                           |
| Final <i>R</i> indexes<br>[ <i>I</i> ≥ 2 $\sigma$ ( <i>I</i> )] | <i>R</i> <sub>1</sub> = 0.0315                                                  | <i>R</i> <sub>1</sub> = 0.0422                                                  | <i>R</i> <sub>1</sub> = 0.0481                                                  |
|                                                                 | w <i>R</i> <sub>2</sub> = 0.0718                                                | w <i>R</i> <sub>2</sub> = 0.1263                                                | w <i>R</i> <sub>2</sub> = 0.1329                                                |
| Final <i>R</i> indexes<br>[all data]                            | <i>R</i> <sub>1</sub> = 0.0344                                                  | <i>R</i> <sub>1</sub> = 0.0600                                                  | <i>R</i> <sub>1</sub> = 0.0559                                                  |
|                                                                 | w <i>R</i> <sub>2</sub> = 0.0737                                                | w <i>R</i> <sub>2</sub> = 0.1442                                                | w <i>R</i> <sub>2</sub> = 0.1453                                                |
| Largest peak/hole<br>[eÅ <sup>-3</sup> ]                        | 0.45/-0.45                                                                      | 0.61/-0.26                                                                      | 0.14/-0.08                                                                      |
| Flack <i>X</i> parameter                                        | 0.03(2)                                                                         | -                                                                               | 0.04(5)                                                                         |
